# Supplementary material
Source: Springer Nature journal article supplement (https://www.springermedizin.de/resource/supplementary/12878_2013_9_MOESM2_ESM.pdf/9686352)
Supplement: MOESM2 [file 9686352]

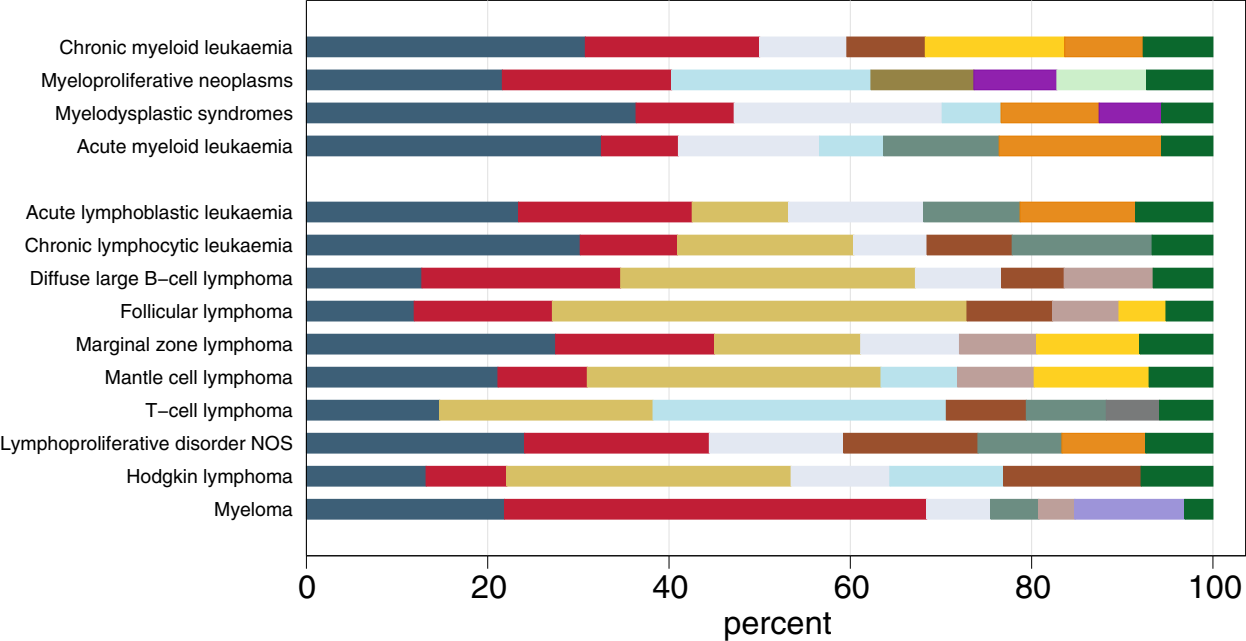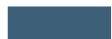

Tiredness

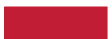

Pain

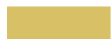

Lump

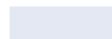

Short of breath/cough

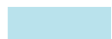

Itching/rash

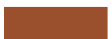

Abnormal sweating

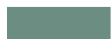

Infections

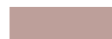

Stomach/bowel

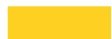

Weight loss

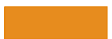

Bleeding/bruising

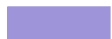

Joint problems/fractures

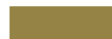

Cardiovascular

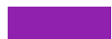

Dizzy/faint

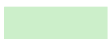

Headaches

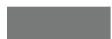

Loss of appetite

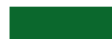

Other
